# Supplementary material for: Electrochromic conjugated N-salicylidene-aniline (anil) functionalized pyrrole and 2,5-dithienylpyrrole-based polymers
Source: Royal Society of Chemistry journal article supplement (doi:10.1039/b504577k), 2005-01-01
Supplement: b504577k.pdf [file b504577k.pdf]

## Supporting Information: Crystal Structure Information for compound **2**.

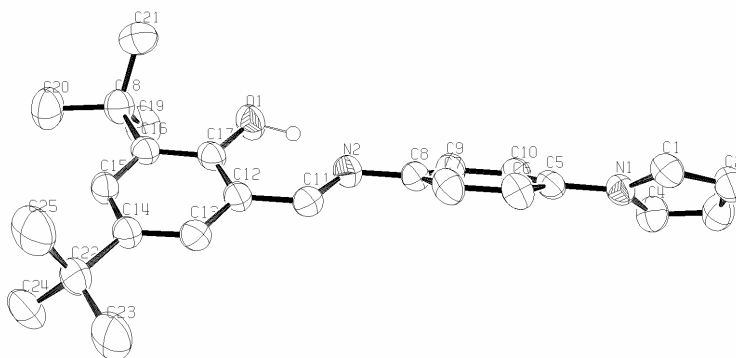

Figure 1: Crystal structure of monomer **2**.

Table 1. Crystal data and structure refinement for **2**.

|                                 |                                                  |                  |
|---------------------------------|--------------------------------------------------|------------------|
| Empirical formula               | C <sub>25</sub> H <sub>30</sub> N <sub>2</sub> O |                  |
| Formula weight                  | 374.51                                           |                  |
| Temperature                     | 193(2) K                                         |                  |
| Wavelength                      | 0.71073 Å                                        |                  |
| Crystal system                  | Triclinic                                        |                  |
| Space group                     | P-1                                              |                  |
| Unit cell dimensions            | a = 9.8773(6) Å                                  | α = 100.878(2)°. |
|                                 | b = 12.1540(7) Å                                 | β = 93.328(2)°.  |
|                                 | c = 18.6430(11) Å                                | γ = 94.944(2)°.  |
| Volume                          | 2183.3(2) Å <sup>3</sup>                         |                  |
| Z                               | 4                                                |                  |
| Density (calculated)            | 1.139 Mg/m <sup>3</sup>                          |                  |
| Absorption coefficient          | 0.069 mm <sup>-1</sup>                           |                  |
| F(000)                          | 808                                              |                  |
| Crystal size                    | 0.24 x 0.16 x 0.07 mm <sup>3</sup>               |                  |
| Theta range for data collection | 1.71 to 25.00°.                                  |                  |
| Index ranges                    | -11 ≤ h ≤ 11, -14 ≤ k ≤ 14, -22 ≤ l ≤ 22         |                  |
| Reflections collected           | 16332                                            |                  |
| Independent reflections         | 7625 [R(int) = 0.0375]                           |                  |

|                                   |                                             |
|-----------------------------------|---------------------------------------------|
| Completeness to theta = 25.00°    | 99.1 %                                      |
| Absorption correction             | Integration                                 |
| Max. and min. transmission        | 0.9952 and 0.9844                           |
| Refinement method                 | Full-matrix least-squares on F <sup>2</sup> |
| Data / restraints / parameters    | 7625 / 0 / 581                              |
| Goodness-of-fit on F <sup>2</sup> | 1.021                                       |
| Final R indices [I>2sigma(I)]     | R1 = 0.0552, wR2 = 0.1225 [4710]            |
| R indices (all data)              | R1 = 0.0987, wR2 = 0.1413                   |
| Extinction coefficient            | 0.0013(5)                                   |
| Largest diff. peak and hole       | 0.261 and -0.178 e.Å <sup>-3</sup>          |

$$R1 = \frac{\sum(|F_o| - |F_c|)}{\sum|F_o|}$$

$$wR2 = \frac{[\sum[w(F_o^2 - F_c^2)^2]]}{[\sum[w(F_o^2)^2]]}^{1/2}$$

$$S = \frac{[\sum[w(F_o^2 - F_c^2)^2]]}{(n-p)}^{1/2}$$

$$w = 1/[\sigma^2(F_o^2) + (m*p)^2 + n*p], \quad p = [\max(F_o^2, 0) + 2*F_c^2]/3, \quad m \text{ \& \ } n \text{ are constants.}$$
